# Supplementary material for: Enantioselective total synthesis of macrolide (+)-neopeltolide
Source: Royal Society of Chemistry journal article supplement (doi:10.1039/c3ob41541d), 2013-01-01

Supplementary Material (ESI) for Organic and Biomolecular Chemistry  
This journal is © The Royal Society of Chemistry 2013

# Electronic Supporting Information (ESI) for:

## Enantioselective Total Synthesis of

### Macrolide (+)-Neopeltolide

*Arun K. Ghosh,<sup>\*</sup> Khriesto Shurrush, and Zach Dawson*

Departments of Chemistry and Medicinal Chemistry, Purdue University, West Lafayette, IN

47907

| Contents                                           | Page     |
|----------------------------------------------------|----------|
| <sup>1</sup> H NMR and <sup>13</sup> C NMR Spectra | S2 – S16 |

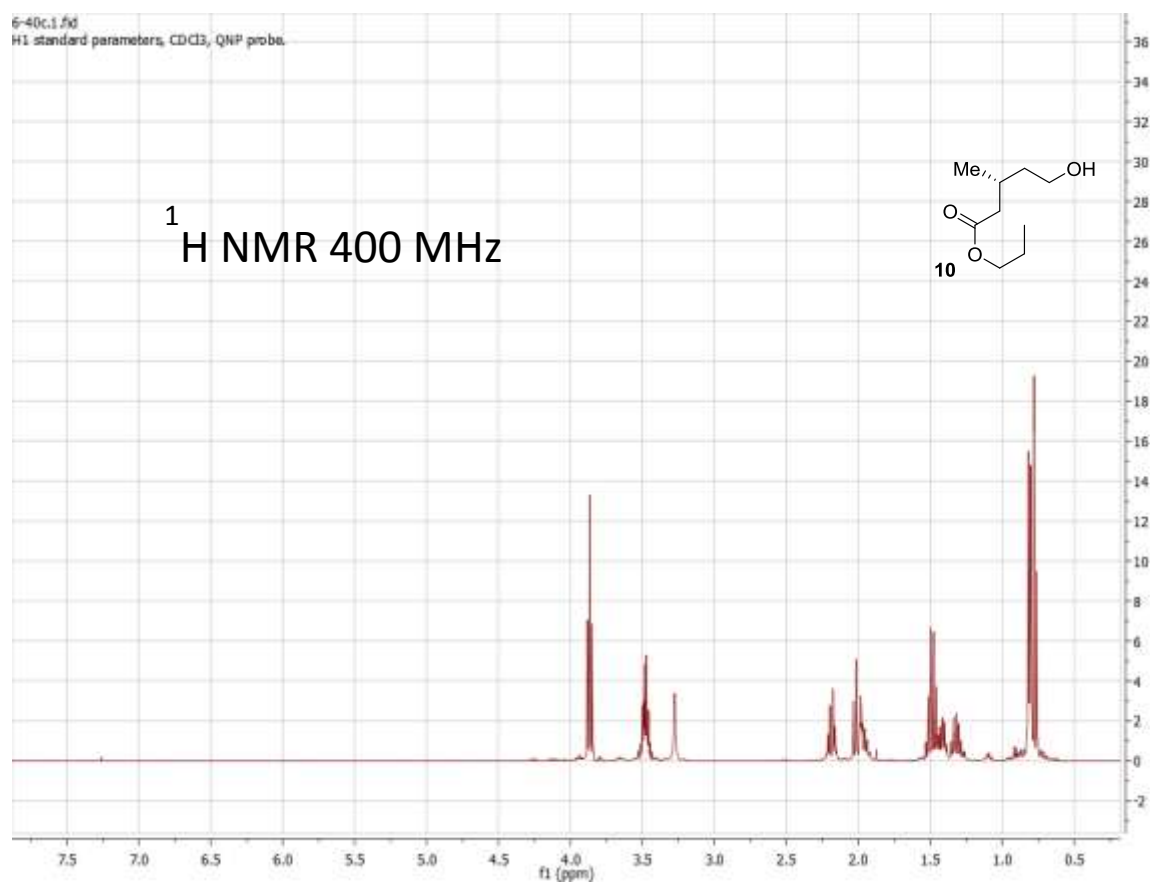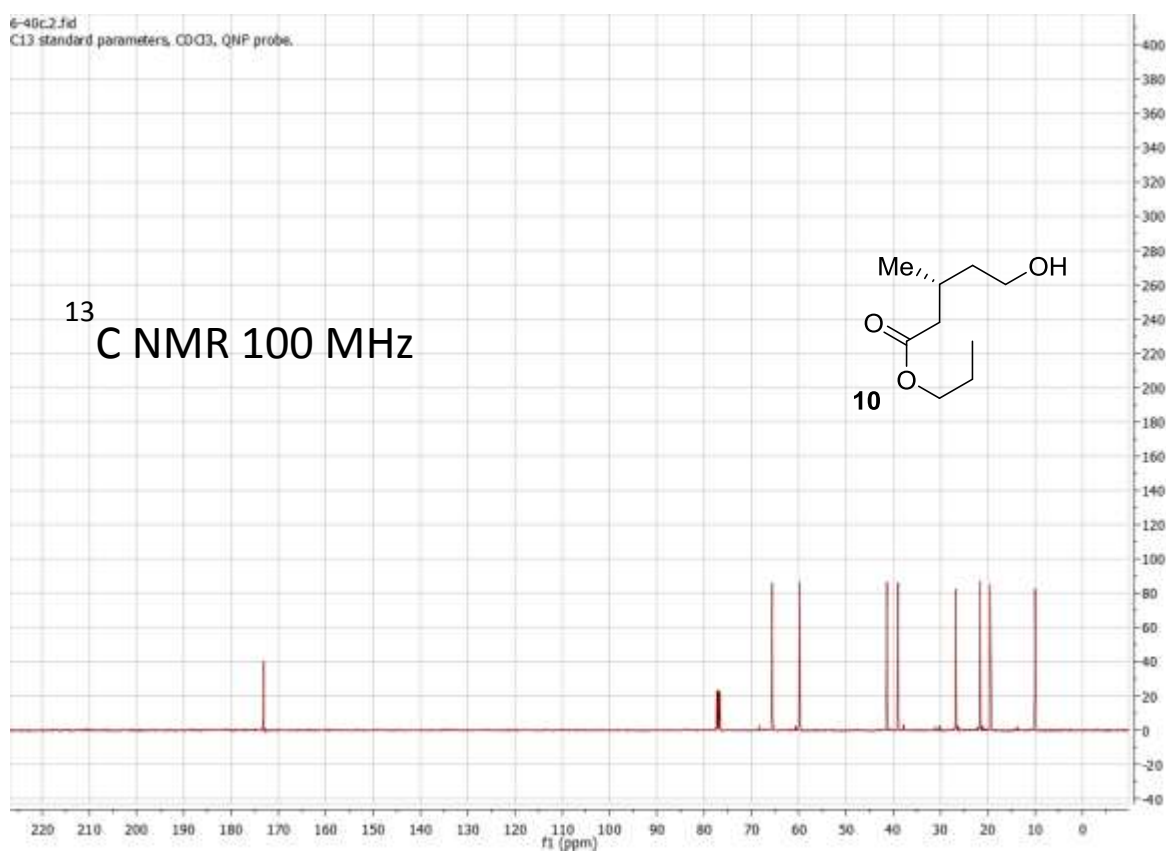

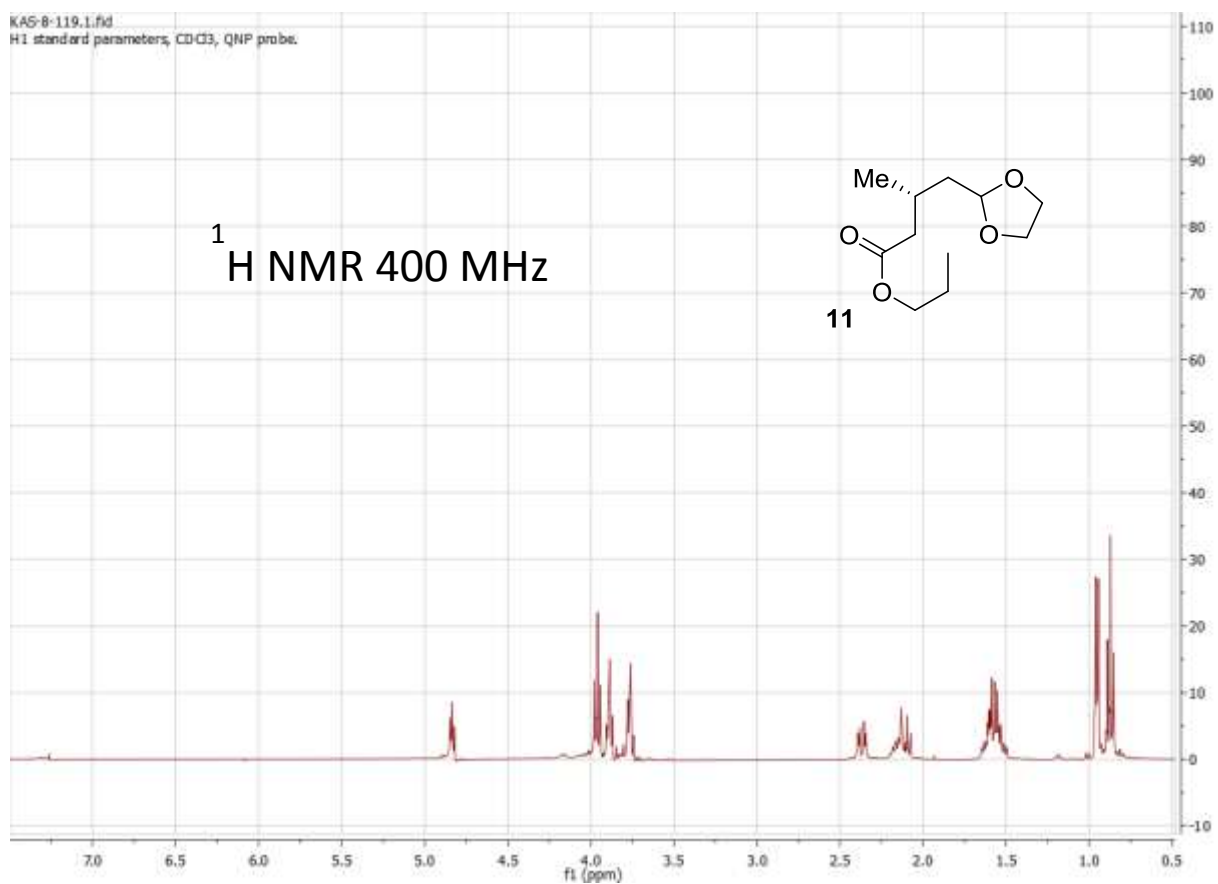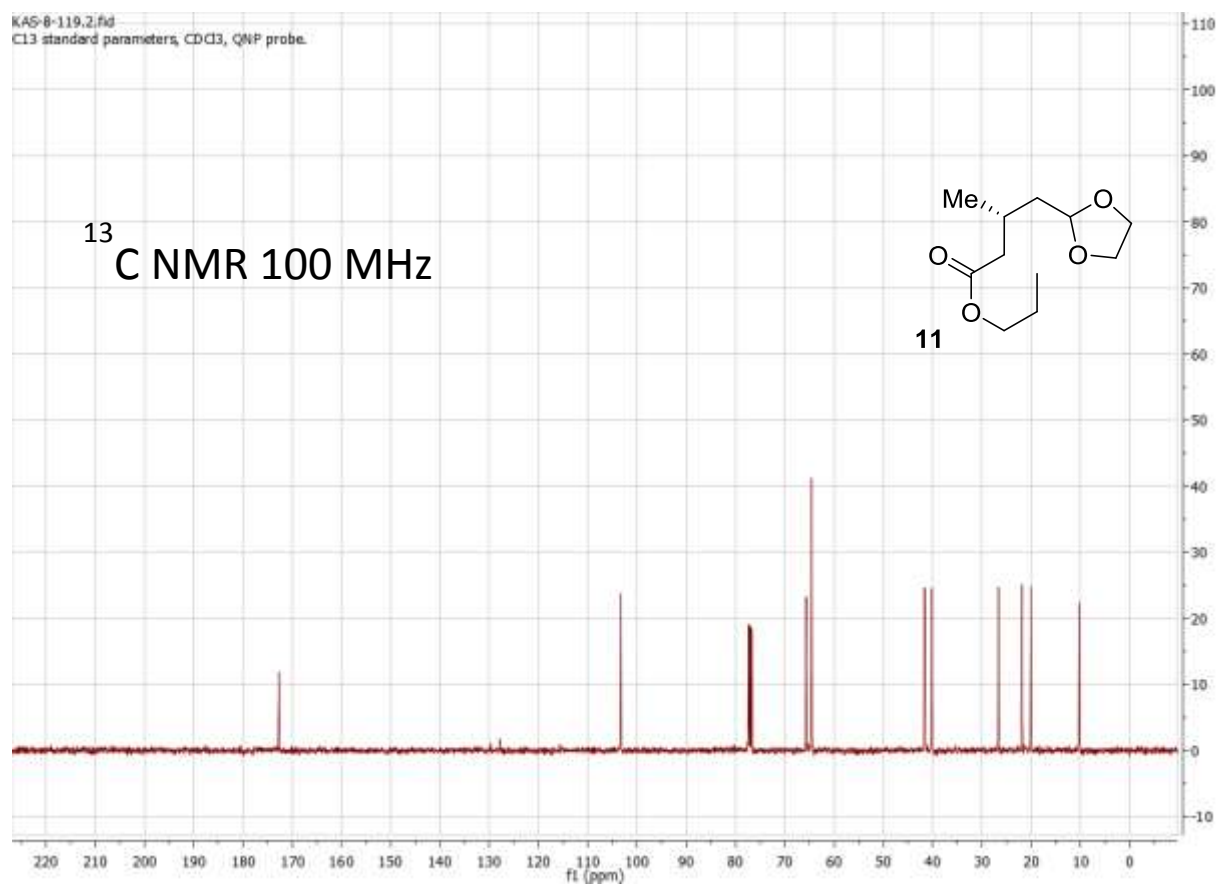



<sup>1</sup>H NMR 400 MHz

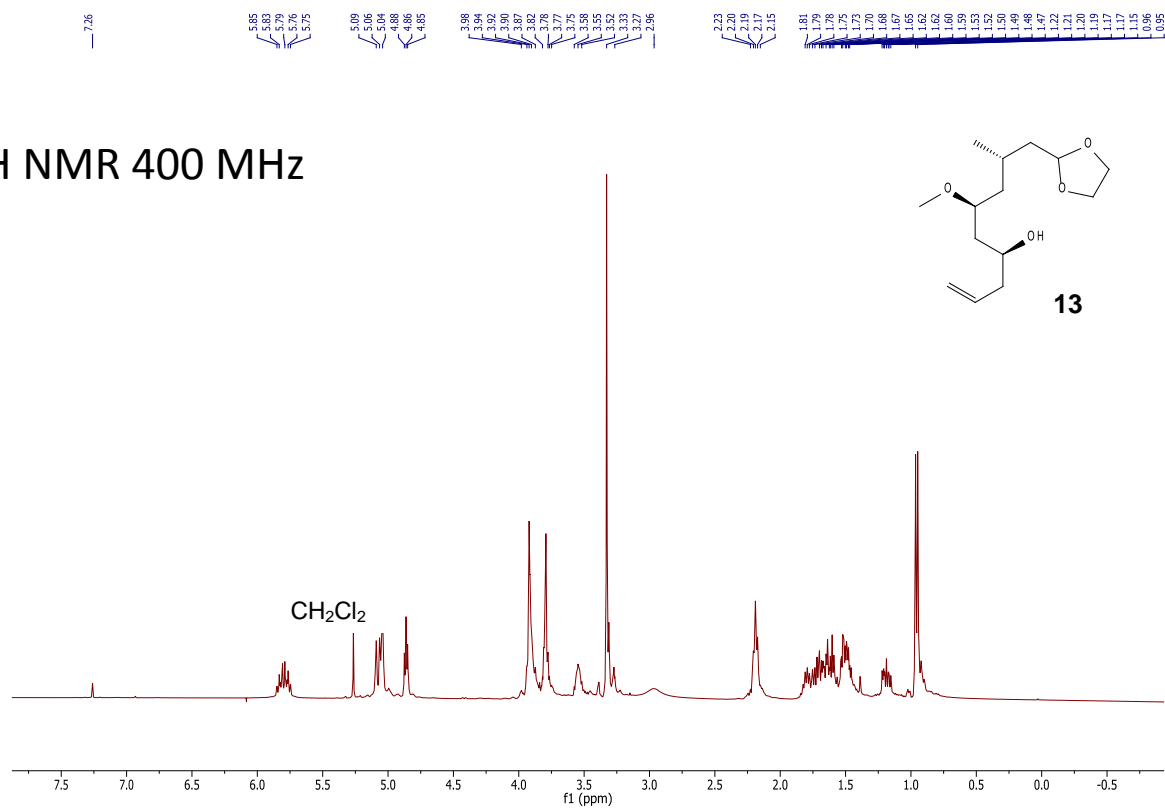

<sup>13</sup>C NMR 100 MHz

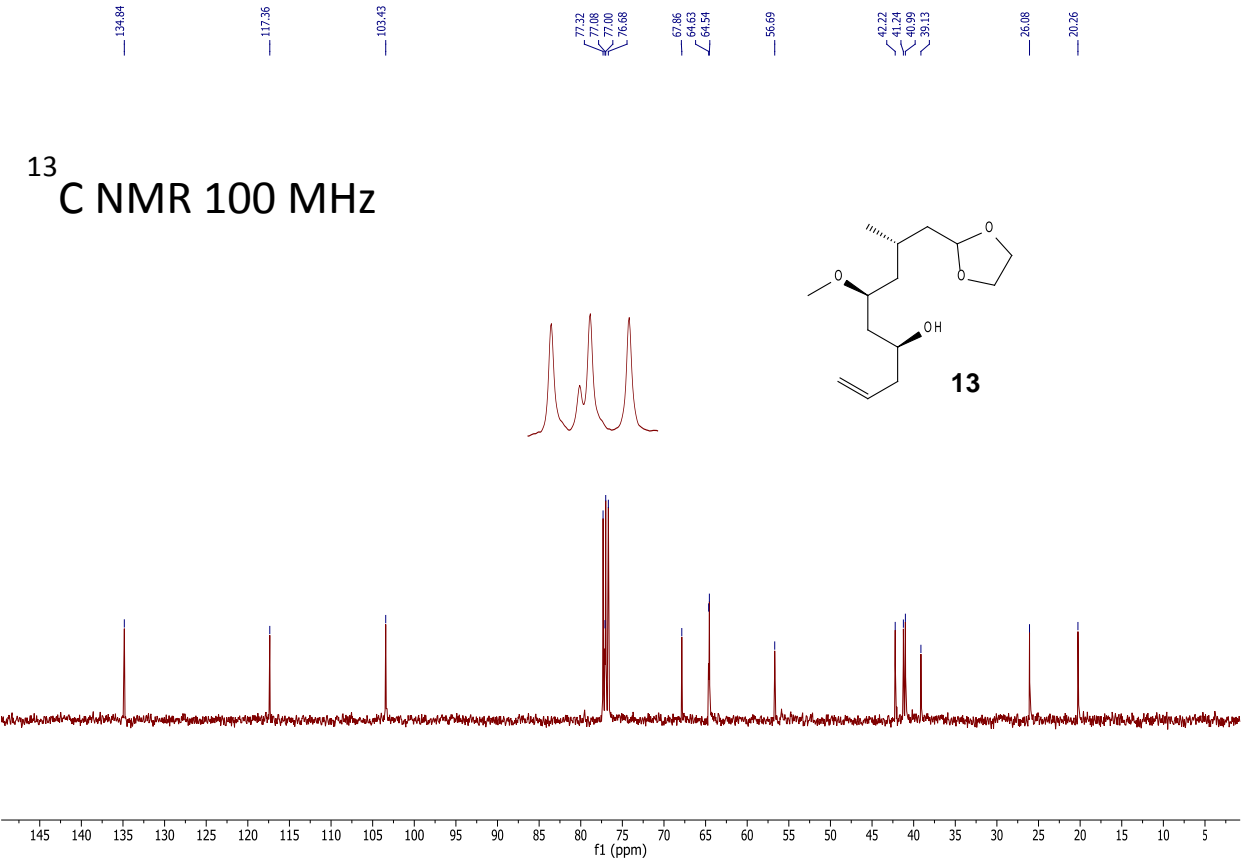

<sup>1</sup>H NMR 400 MHz

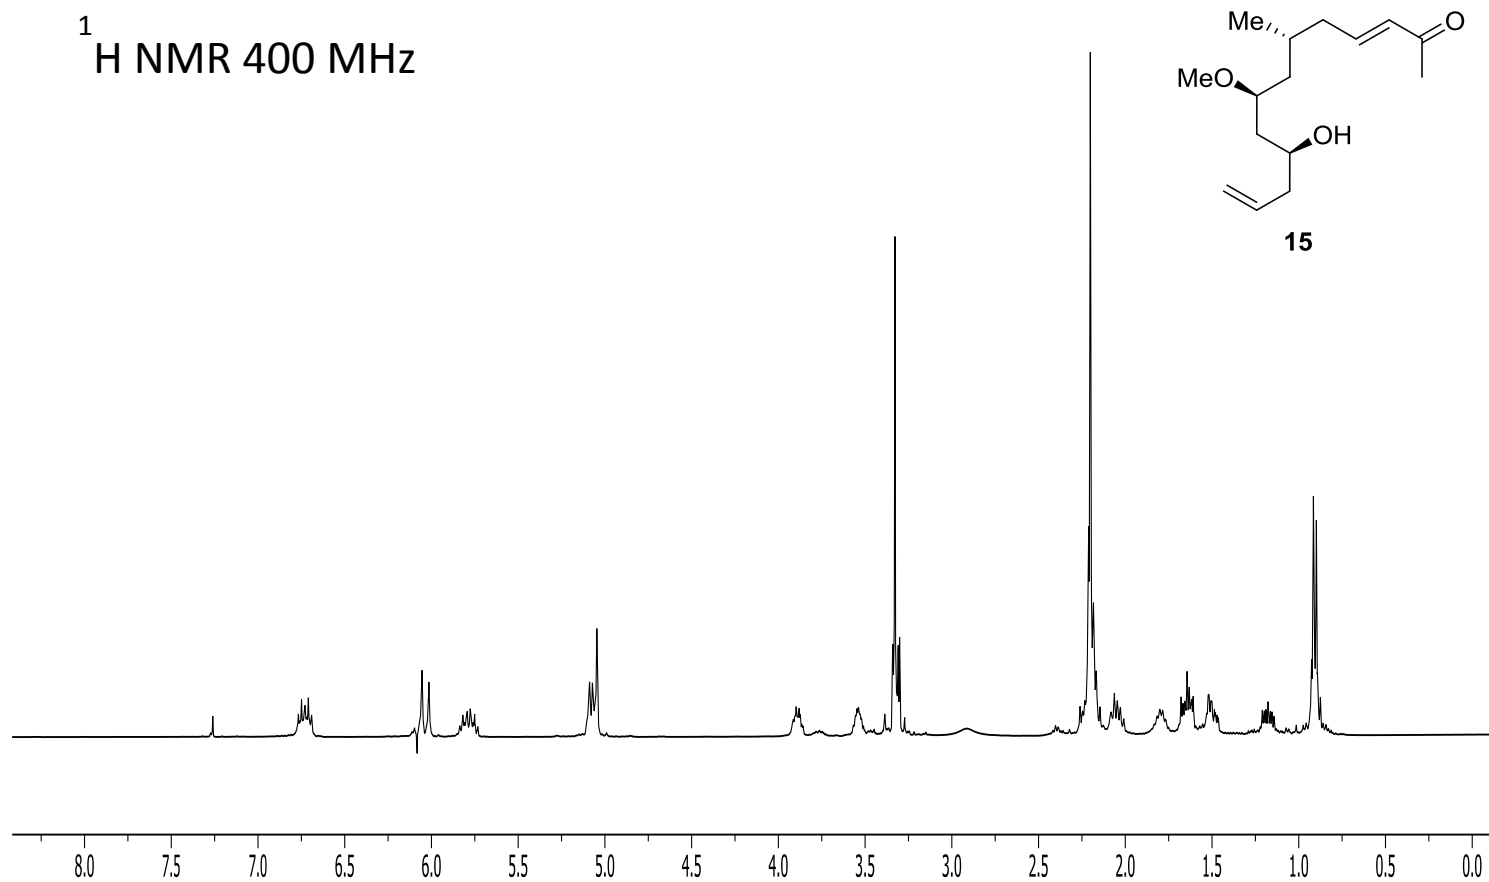

<sup>13</sup>C NMR 100 MHz

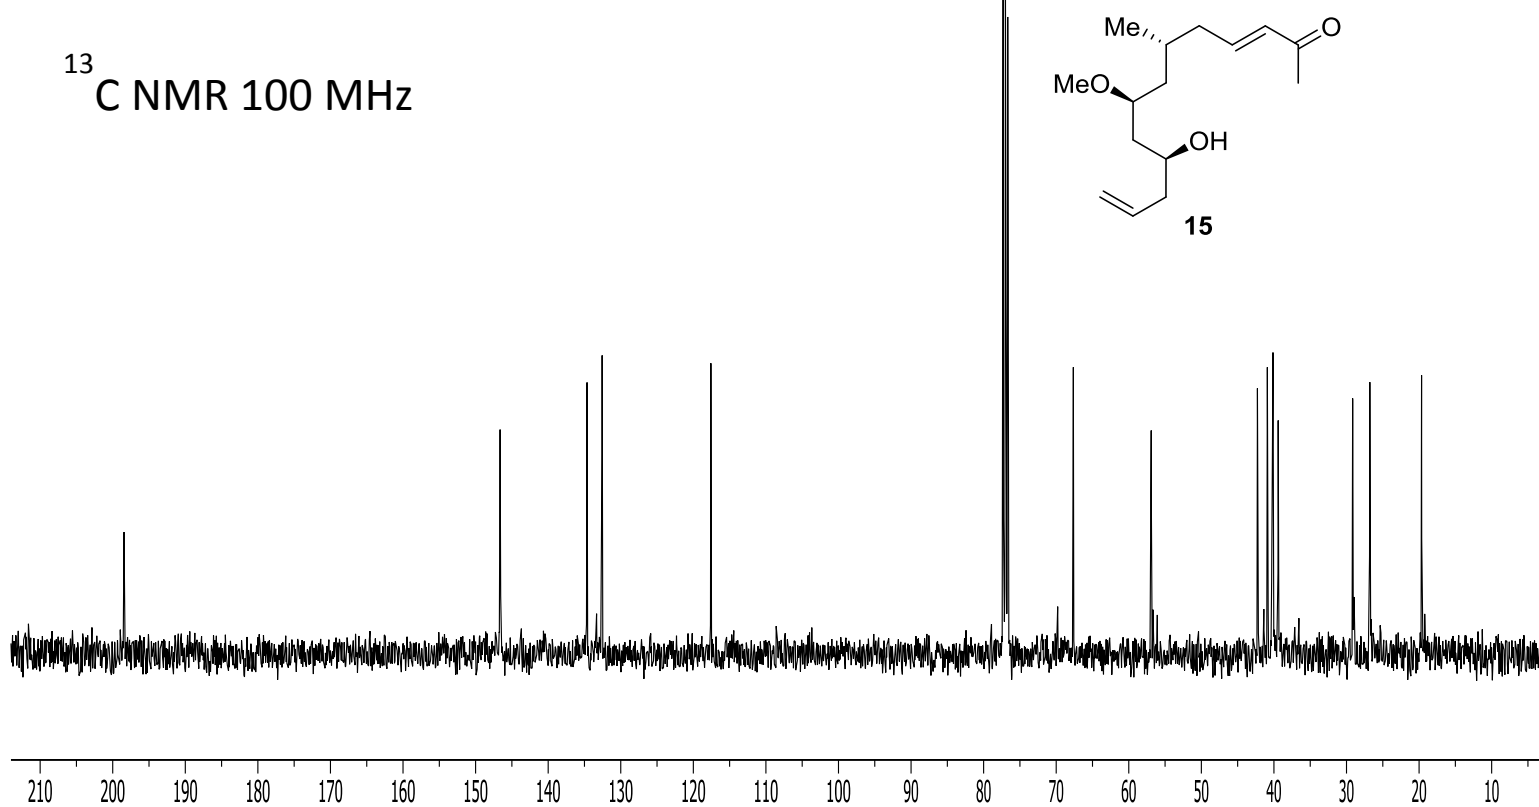

KAS-8-137.1.fid  
H1 standard parameters, CDCl<sub>3</sub>, QNP probe.

<sup>1</sup>H NMR 400 MHz

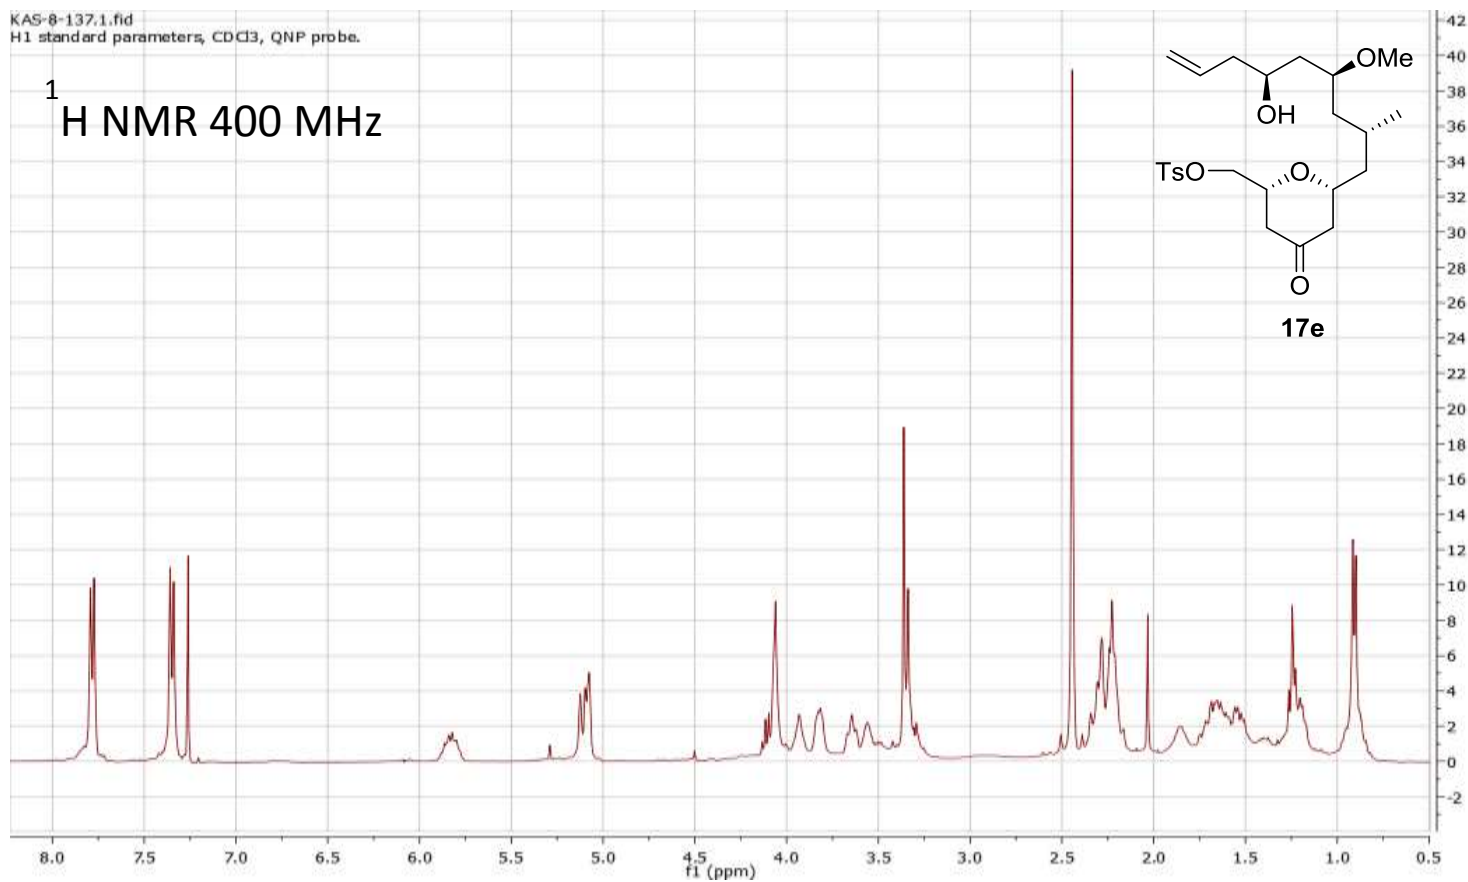

KAS-8-137.2.fid  
C13 standard parameters, CDCl<sub>3</sub>, QNP probe.

<sup>13</sup>C NMR 100 MHz

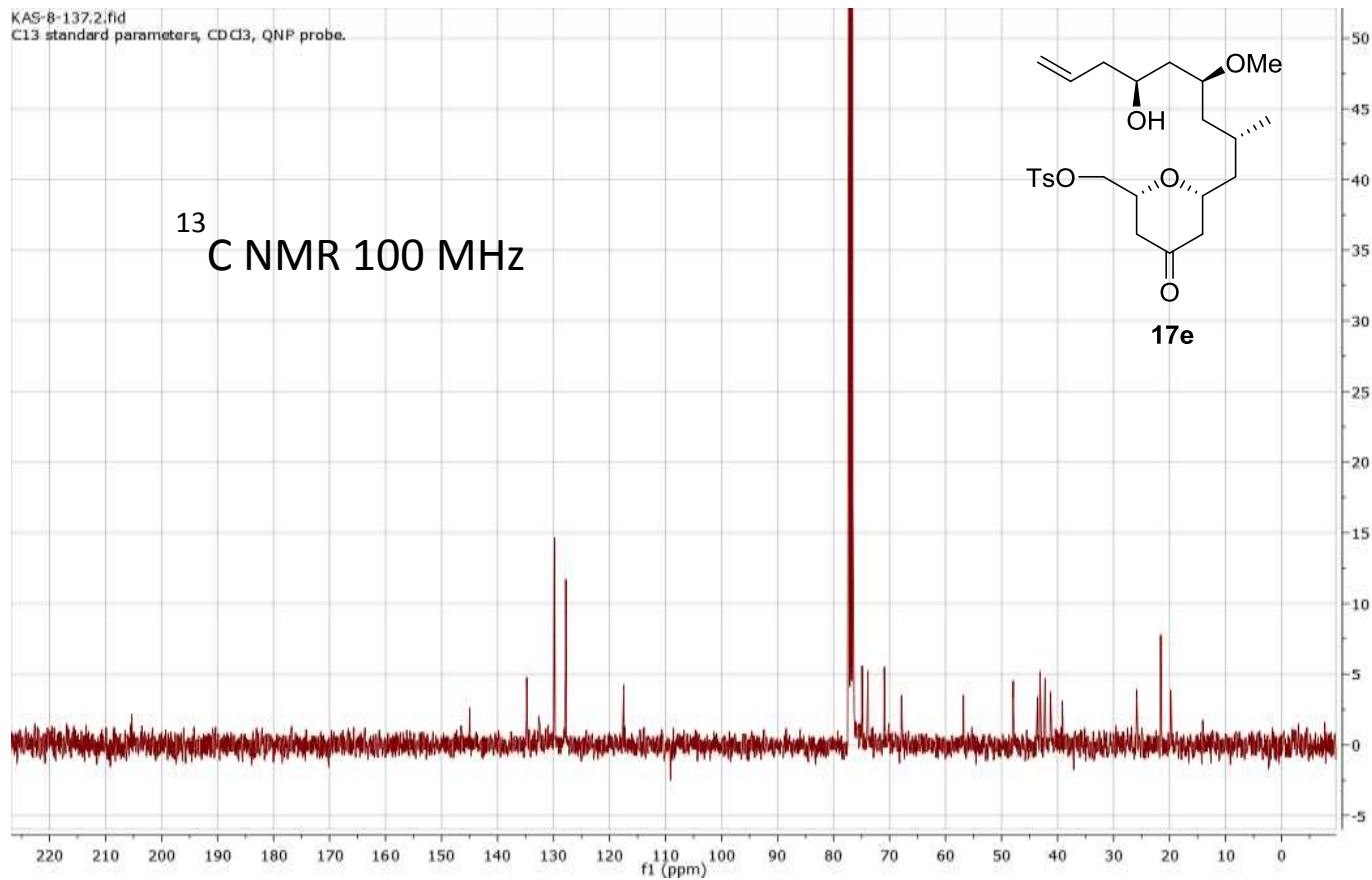

KAS-8-145.2.fid  
 H1 standard parameters, CDCl<sub>3</sub>, QNP probe.

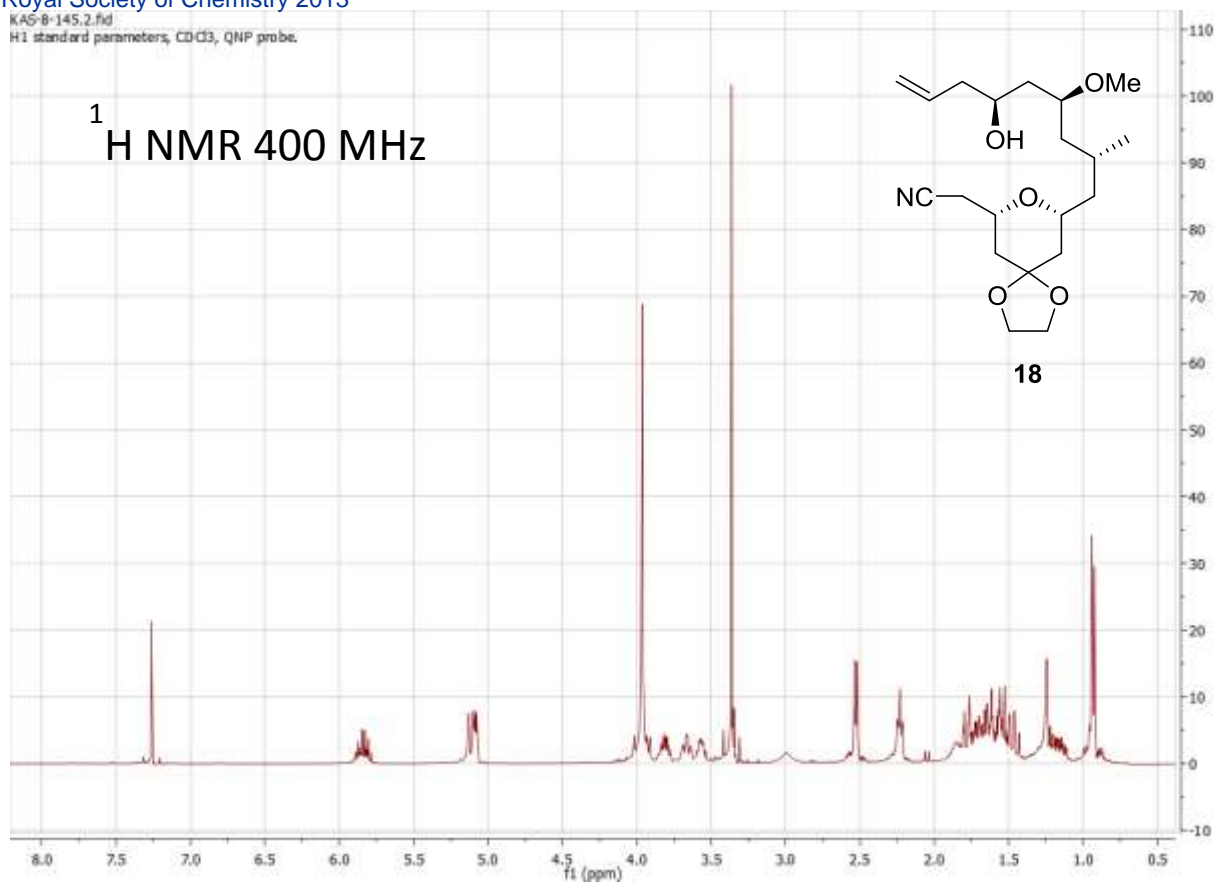

KAS-8-145.3.fid  
 C13 standard parameters, CDCl<sub>3</sub>, QNP probe.

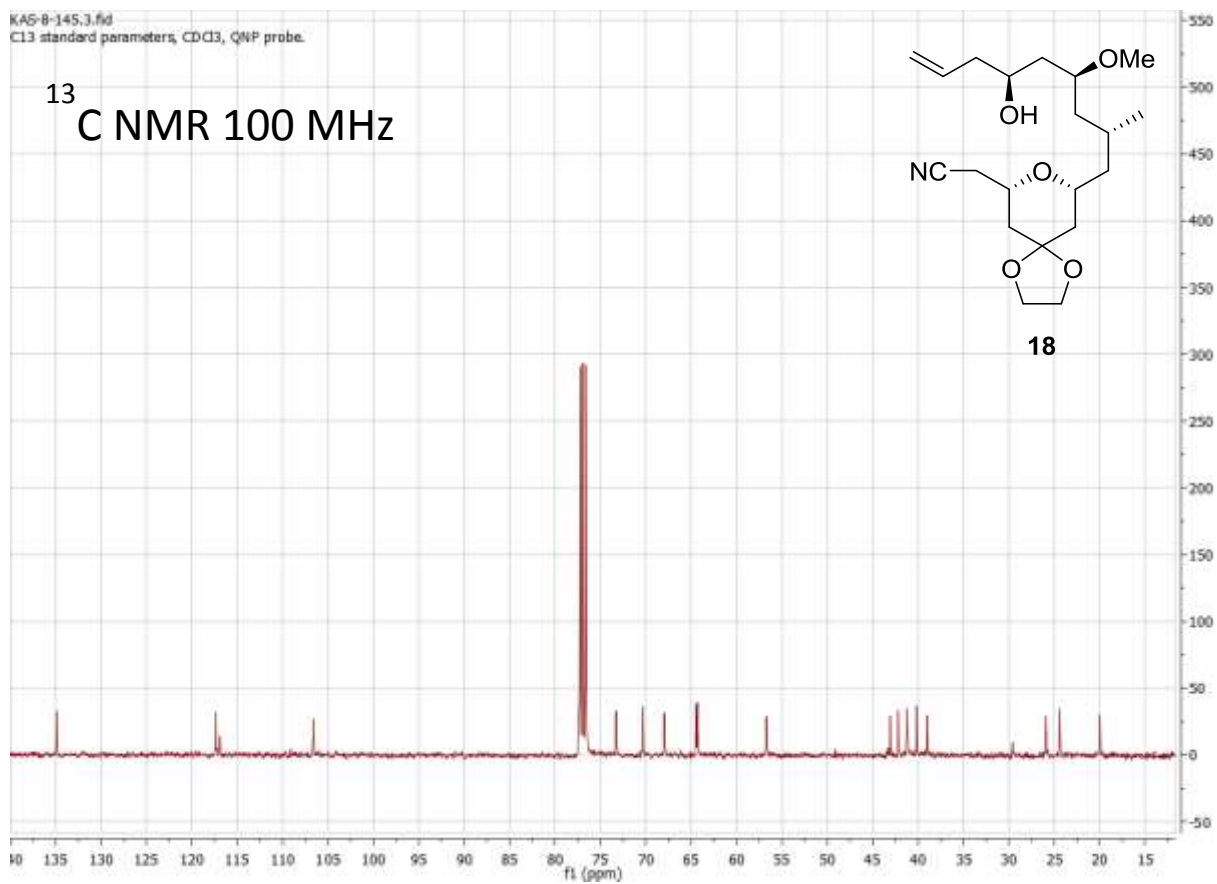



KAS-8-148.1.fid  
H1 standard parameters, TBI probe (#33).

<sup>1</sup>H NMR 500 MHz

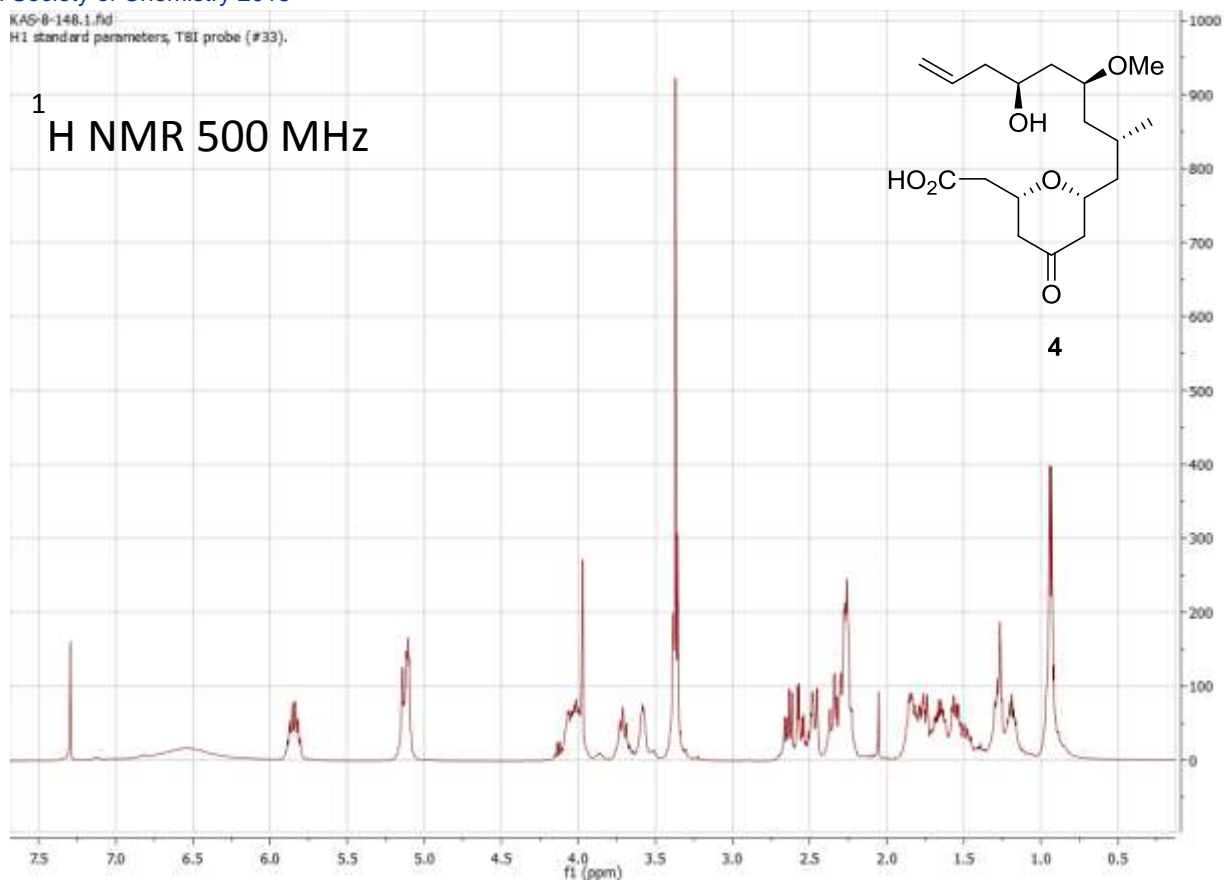

KAS-8-148dix 500.2.fid  
C13 standard parameters, TBI probe (#33), using BB coil.

<sup>13</sup>C NMR 125 MHz

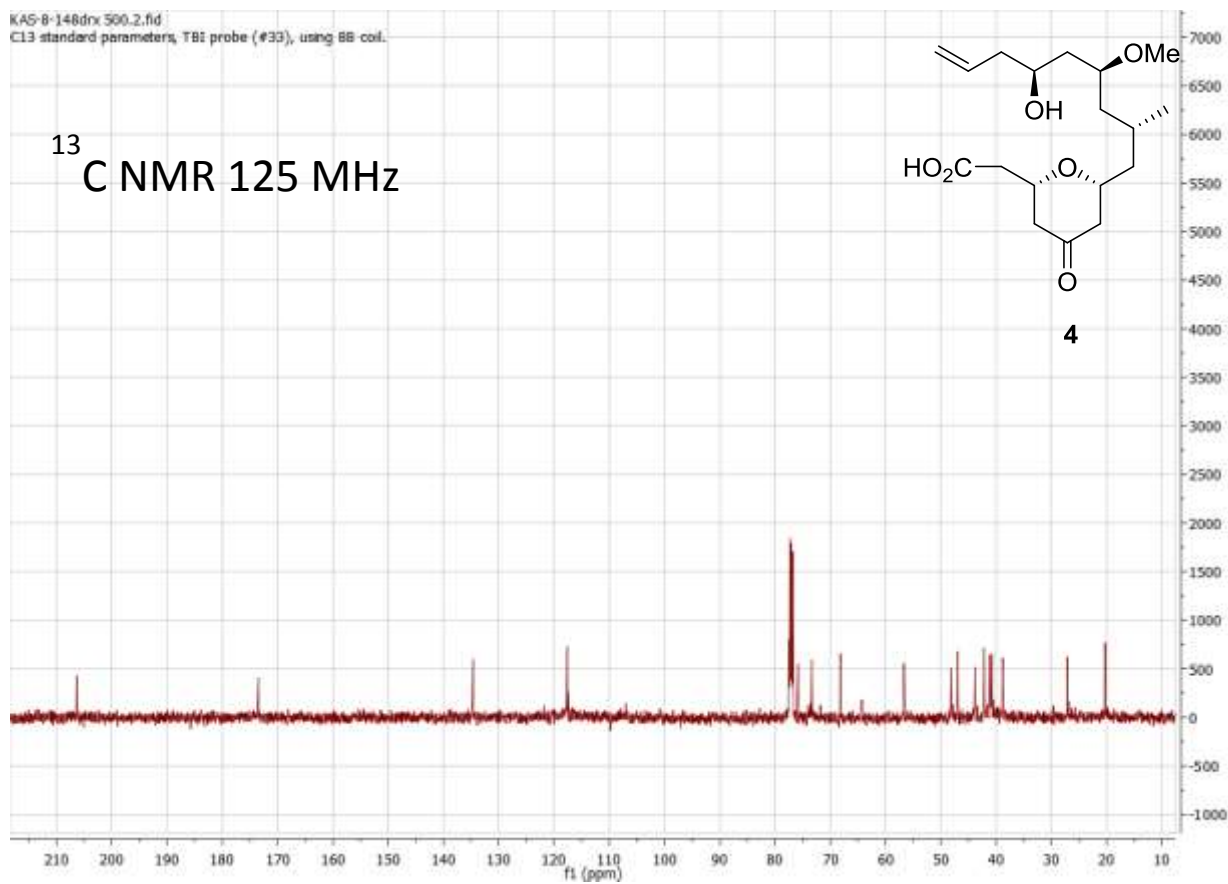

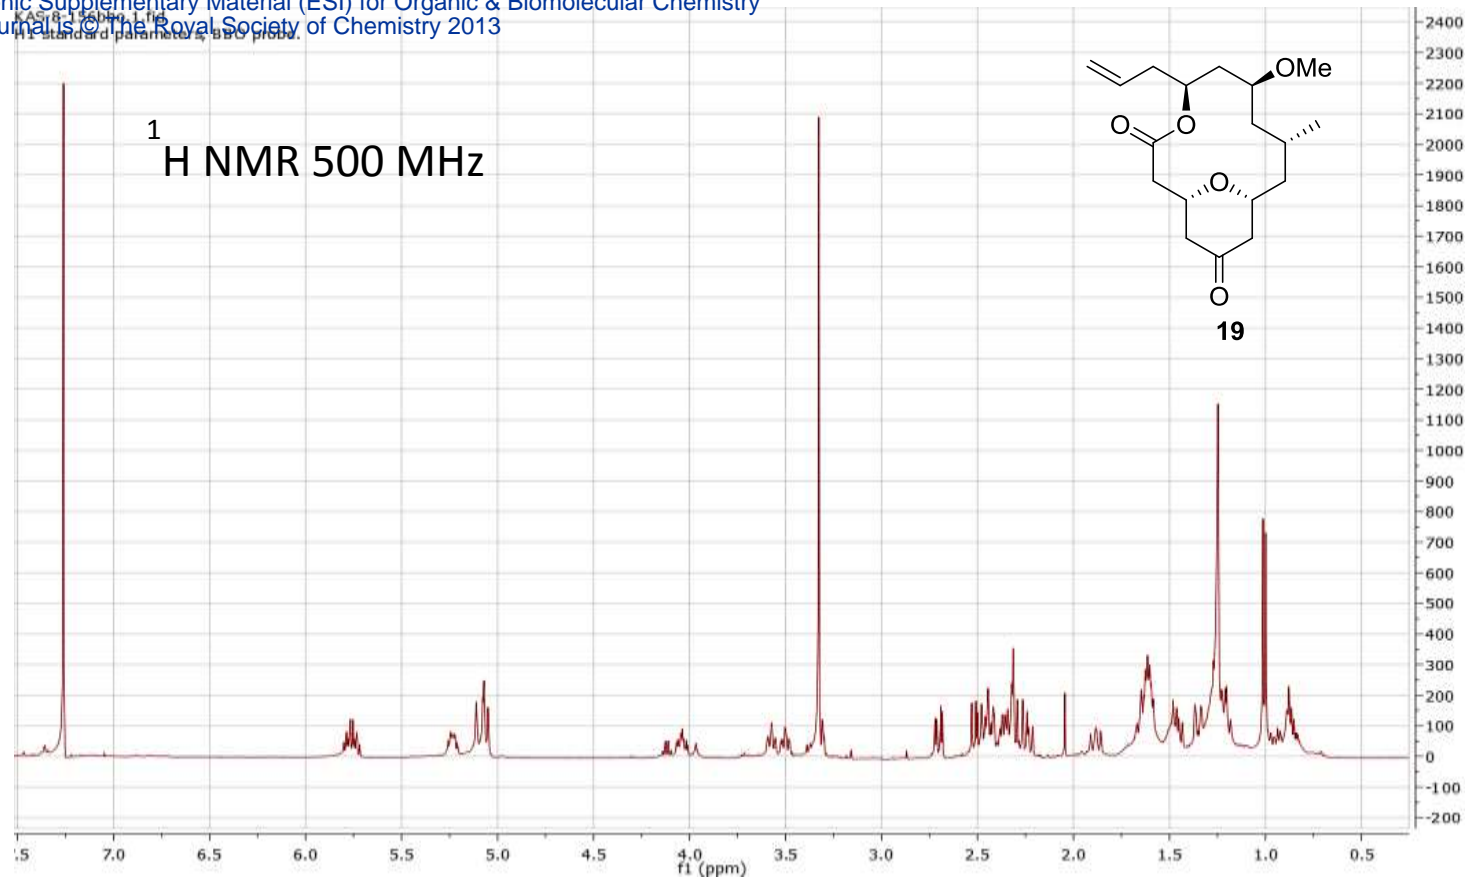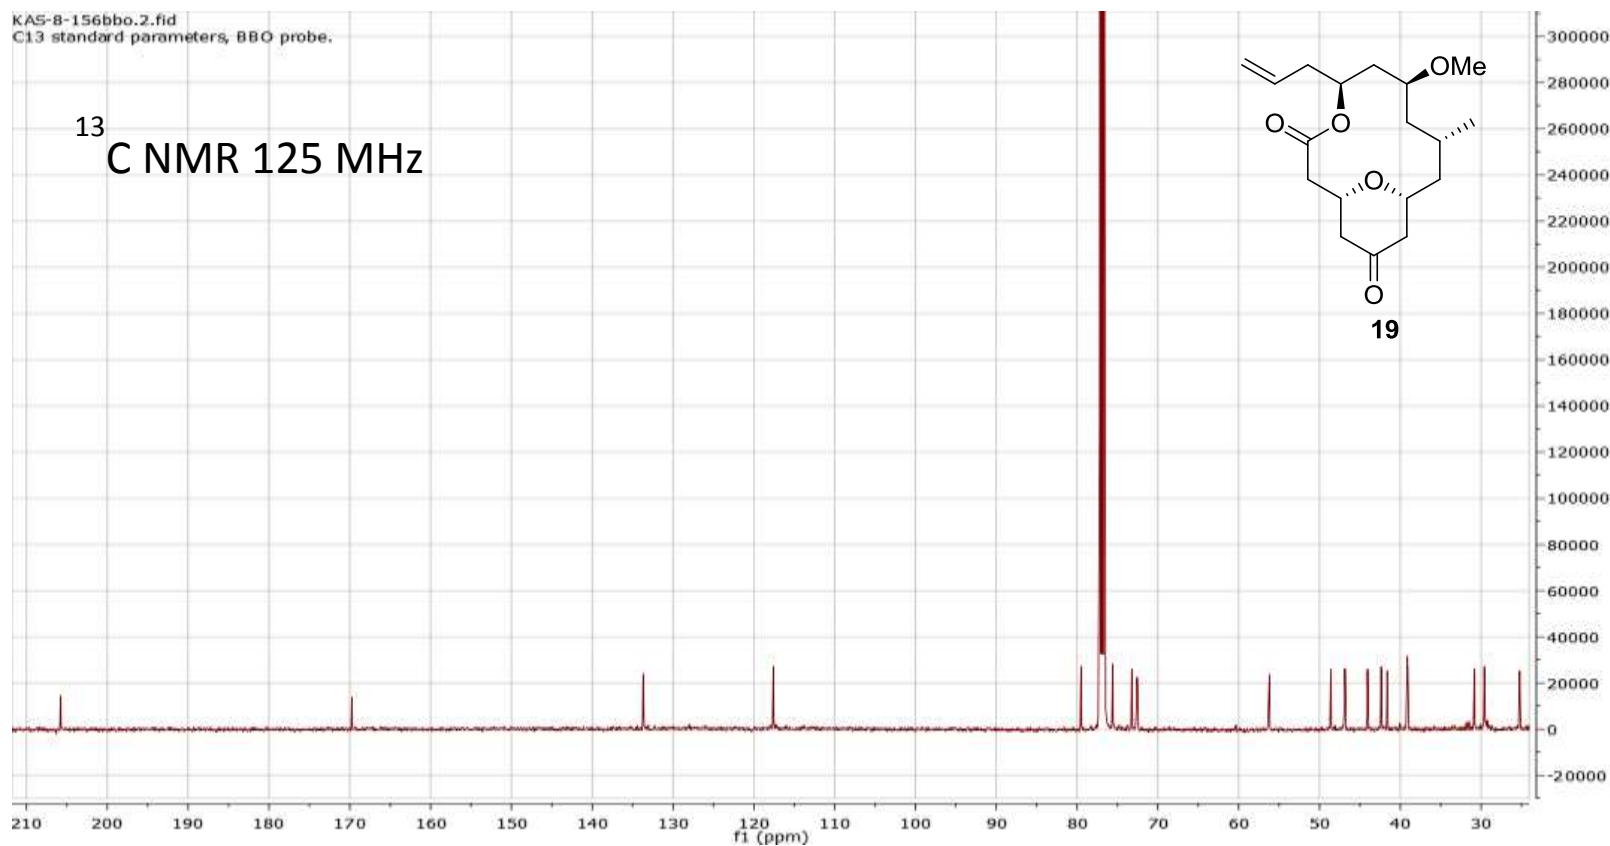

<sup>1</sup>H NMR 400 MHz

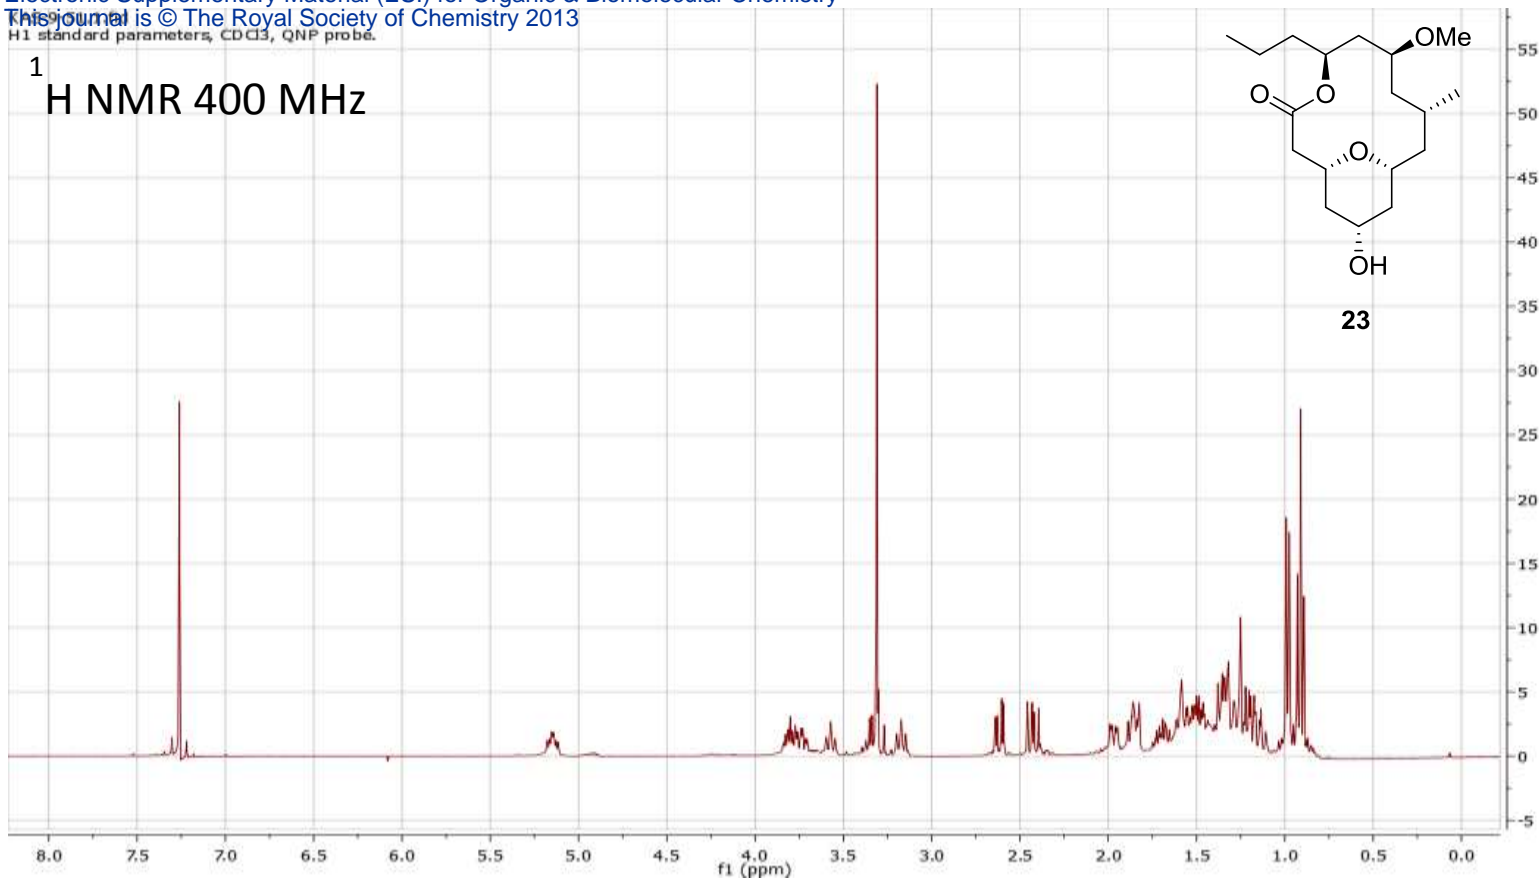

KAS-9-51.2.fid  
C13 standard parameters, CDCl<sub>3</sub>, QNP probe.

<sup>13</sup>C NMR 100MHz

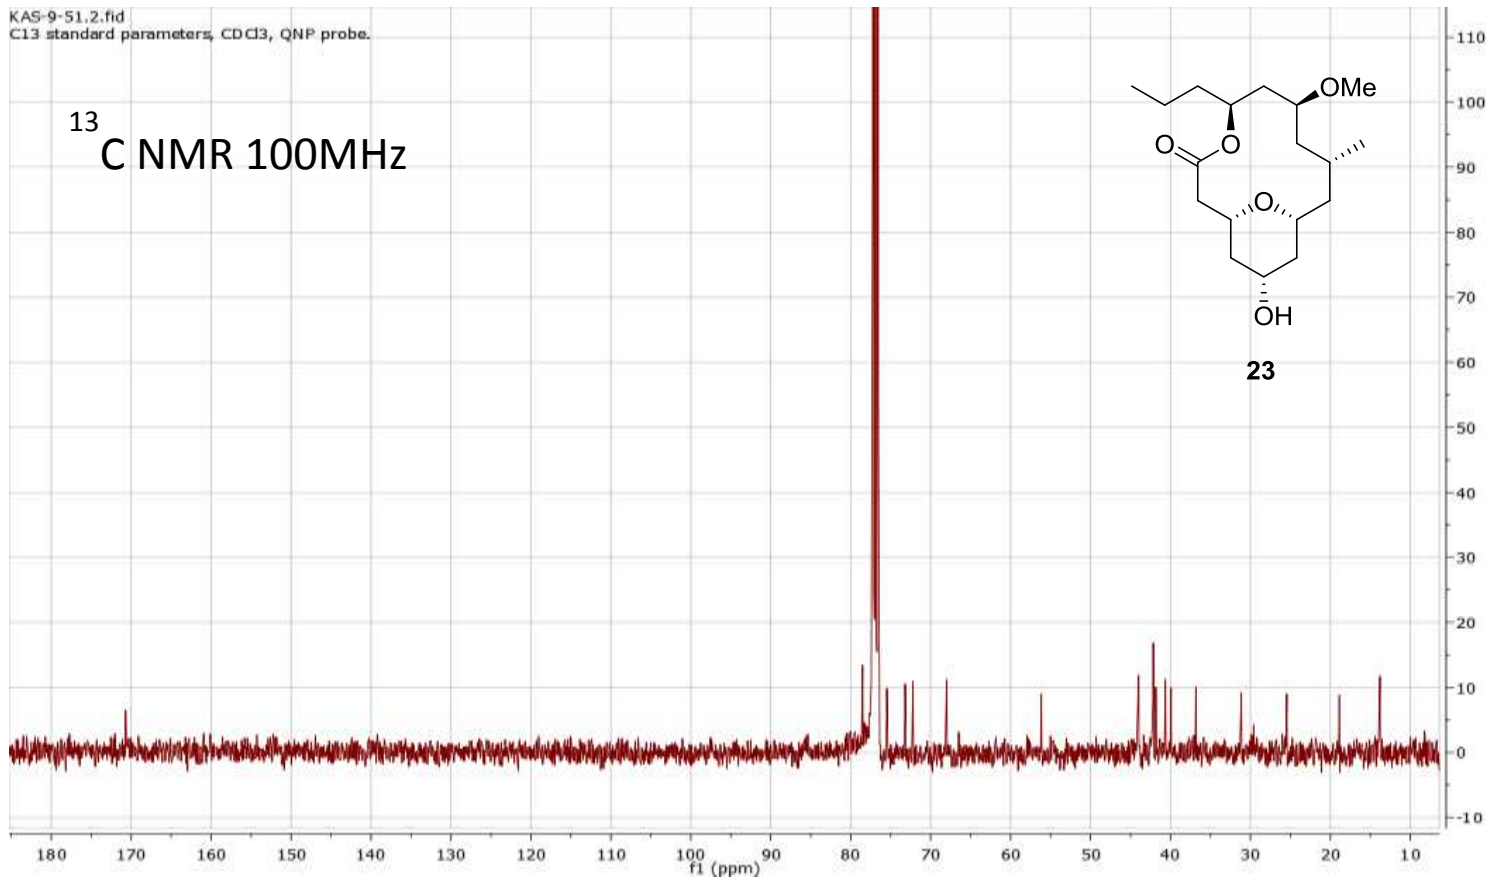

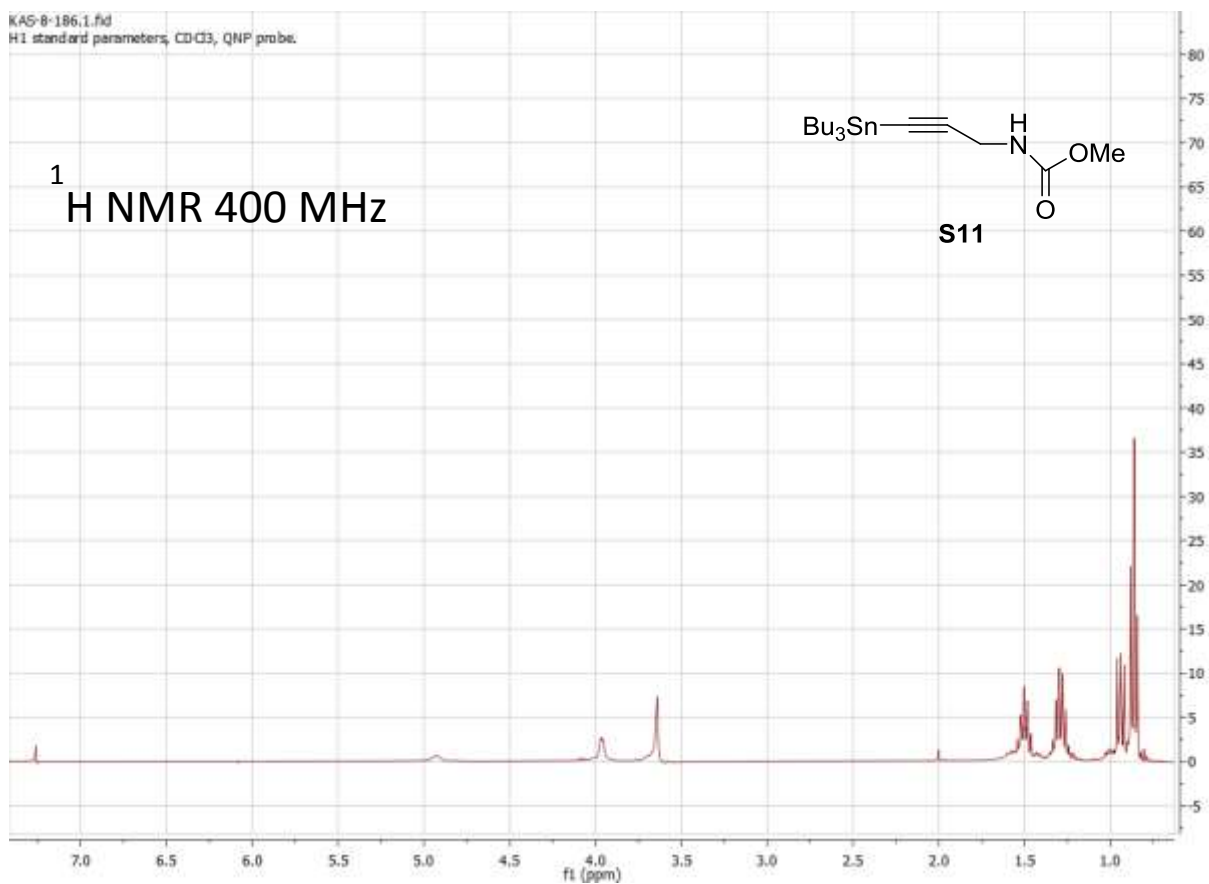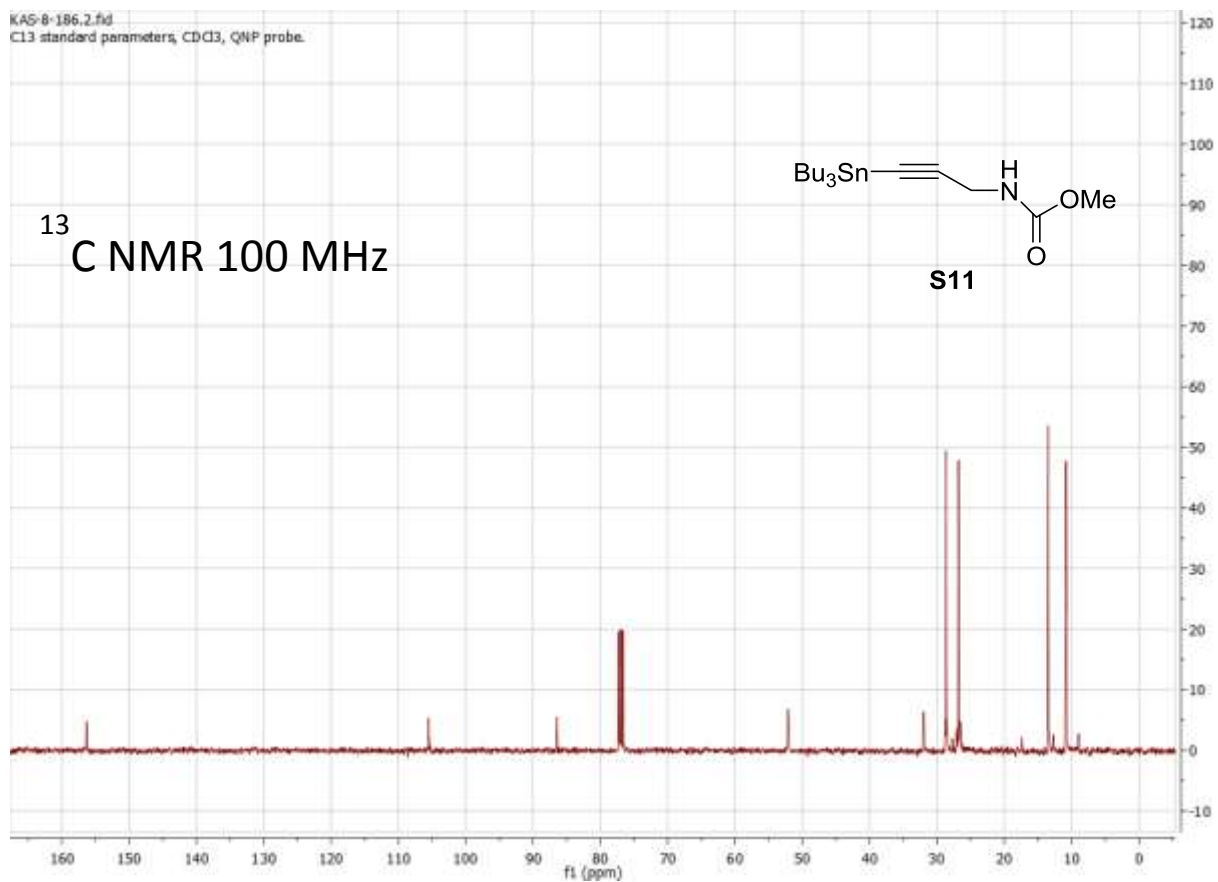

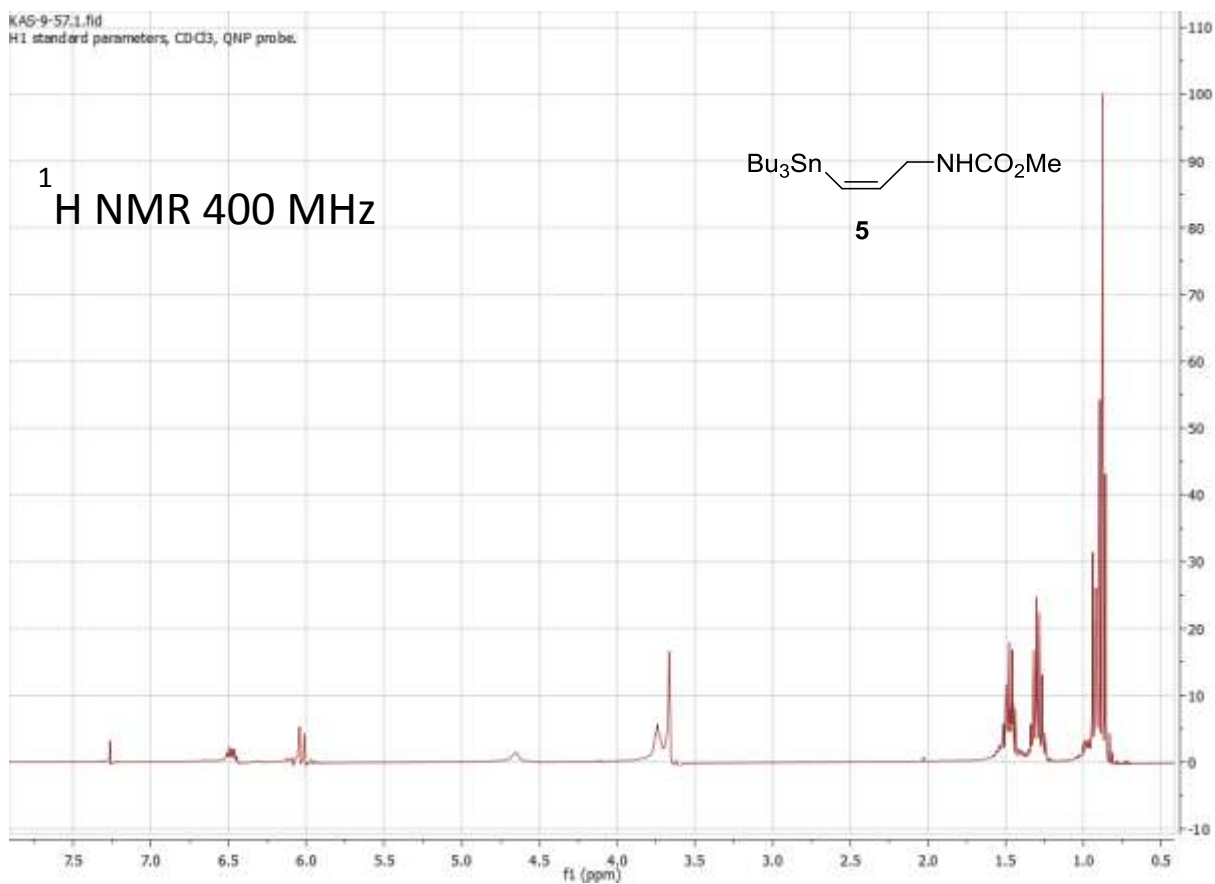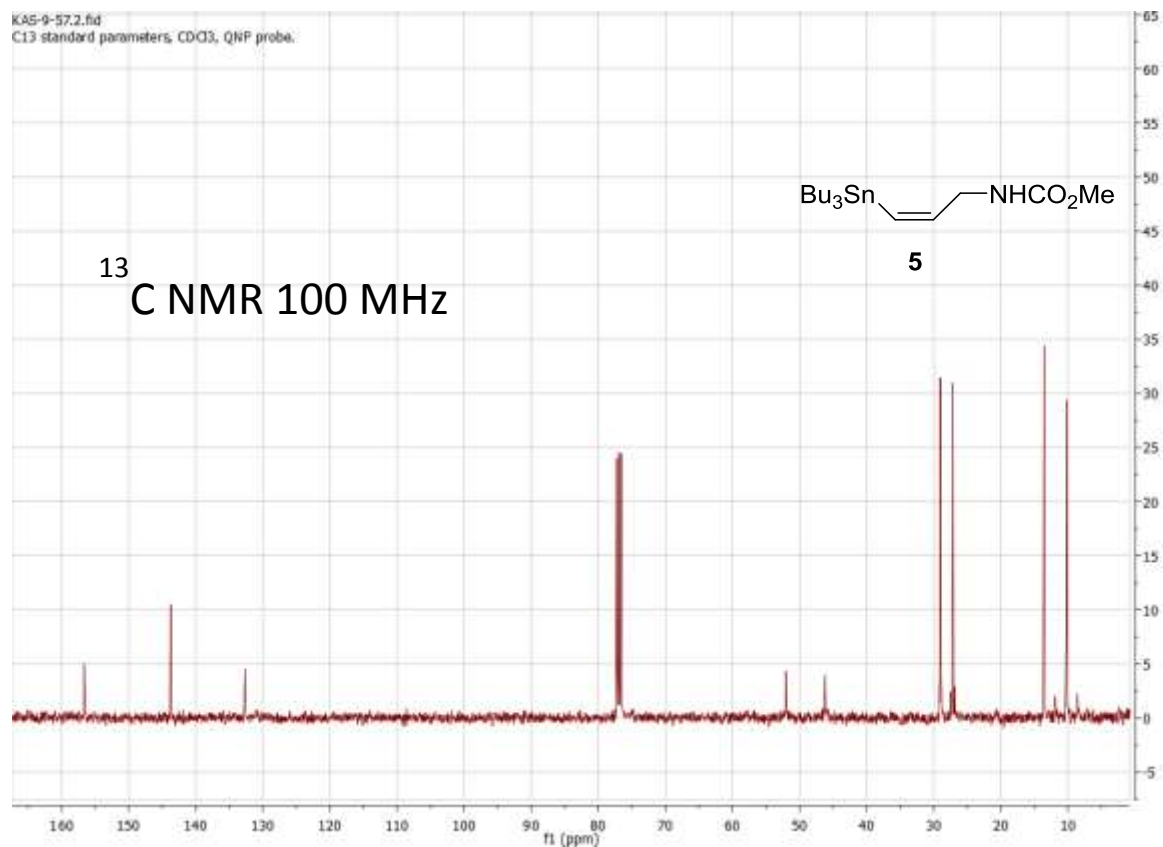

KAS-9-11.1.fid  
H1 standard parameters, CDCl<sub>3</sub>, QNP probe.

<sup>1</sup>H NMR 400 MHz

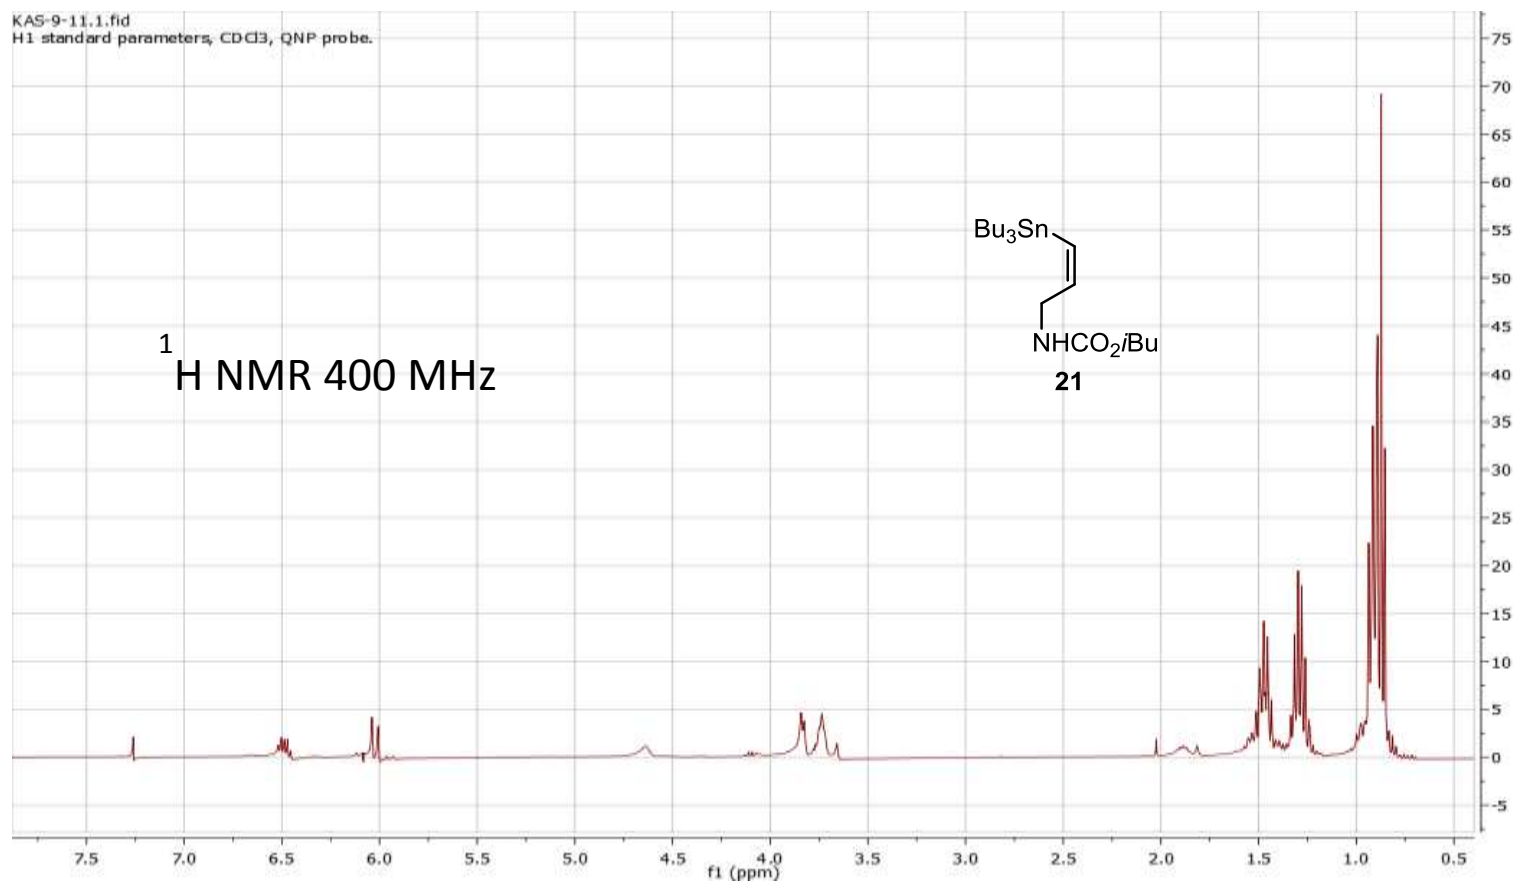

KAS-9-11.2.fid  
C13 standard parameters, CDCl<sub>3</sub>, QNP probe.

<sup>13</sup>C NMR 100 MHz

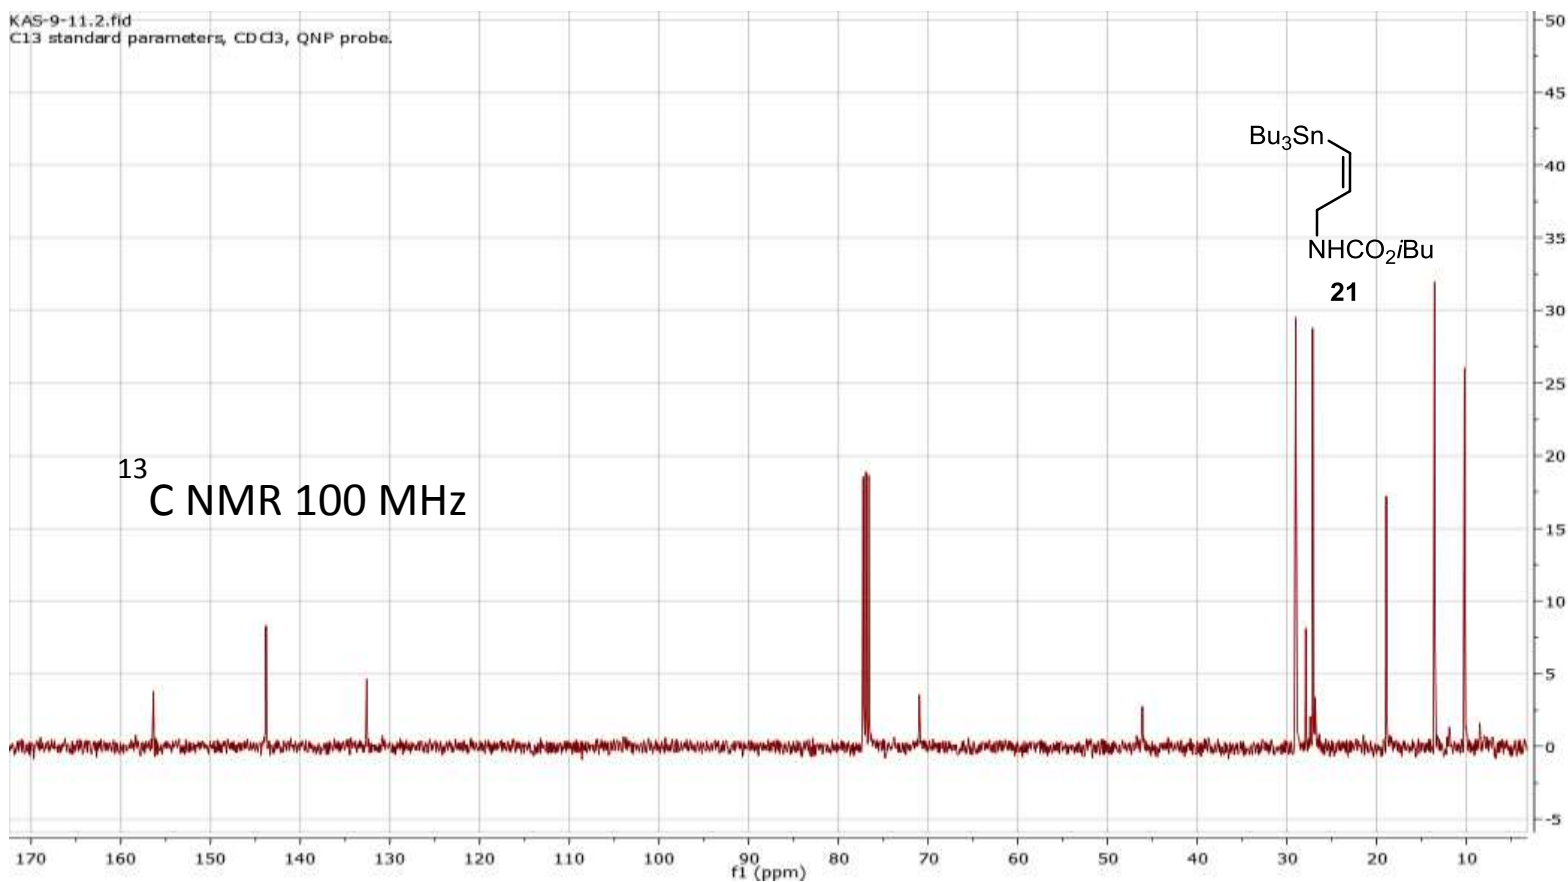

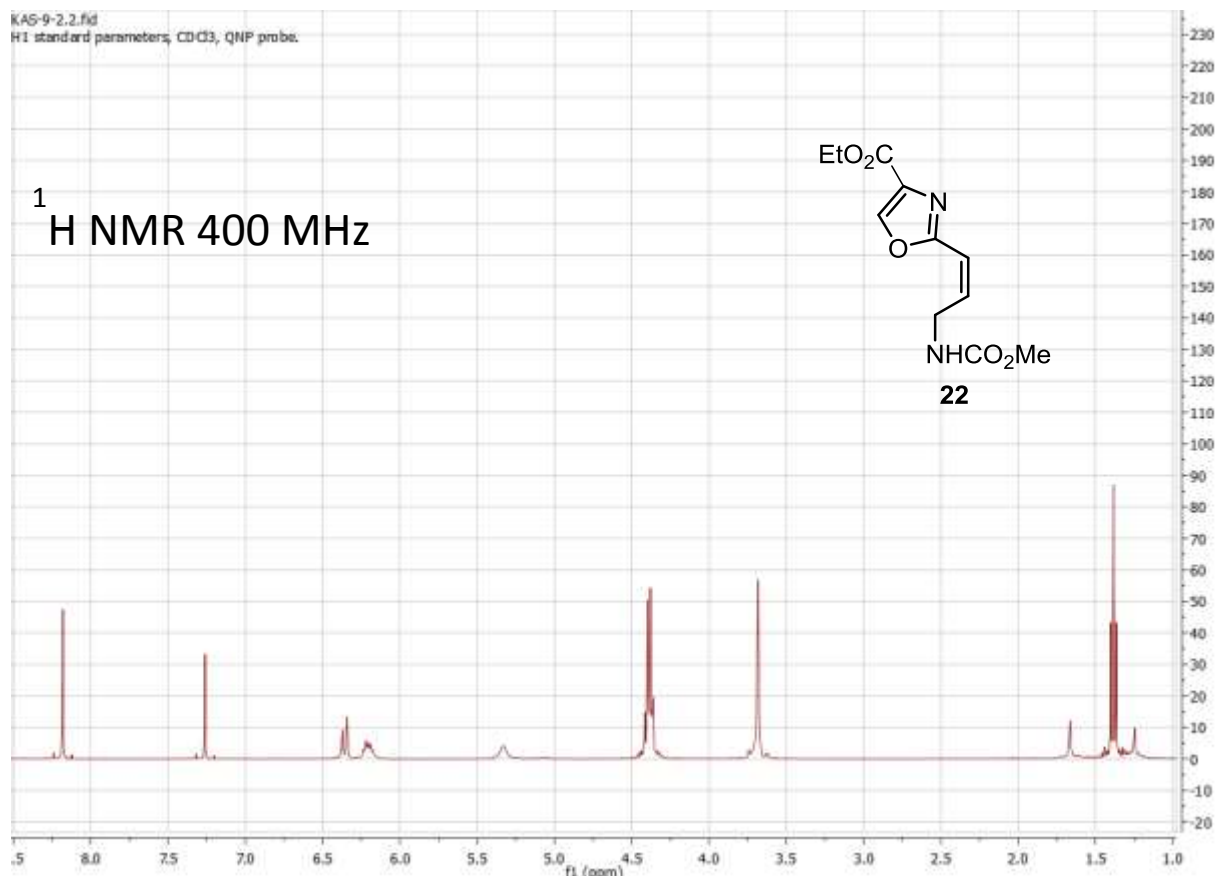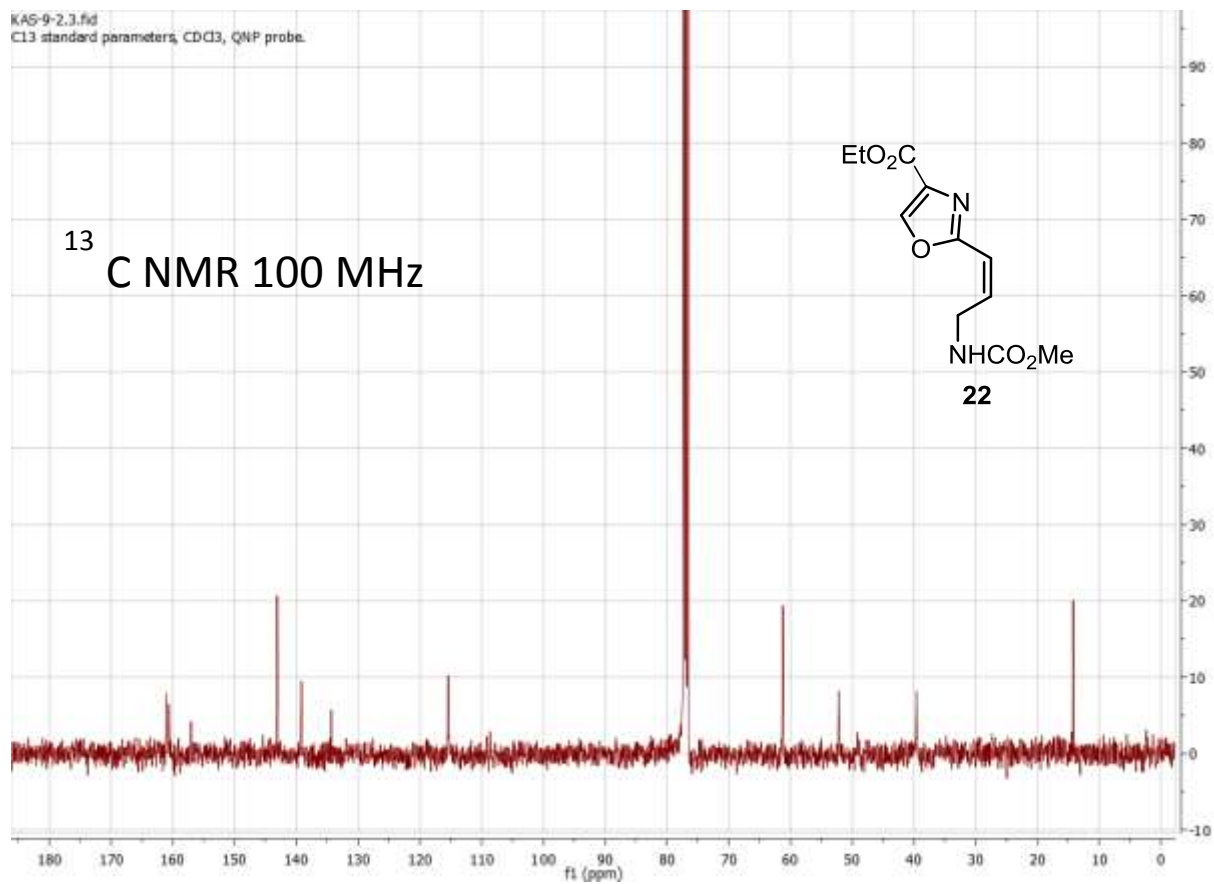



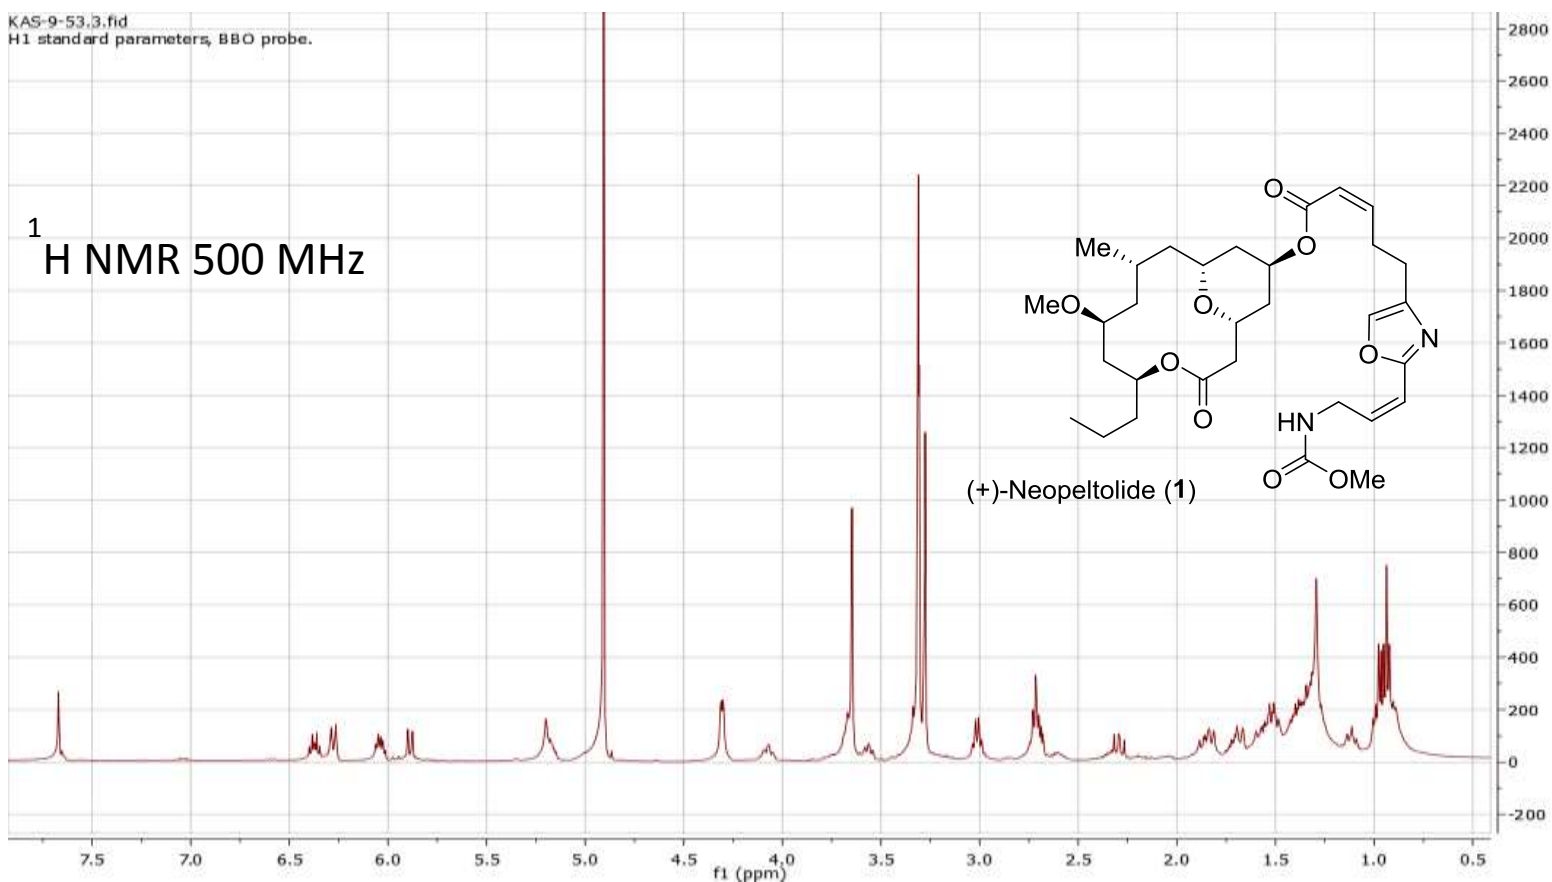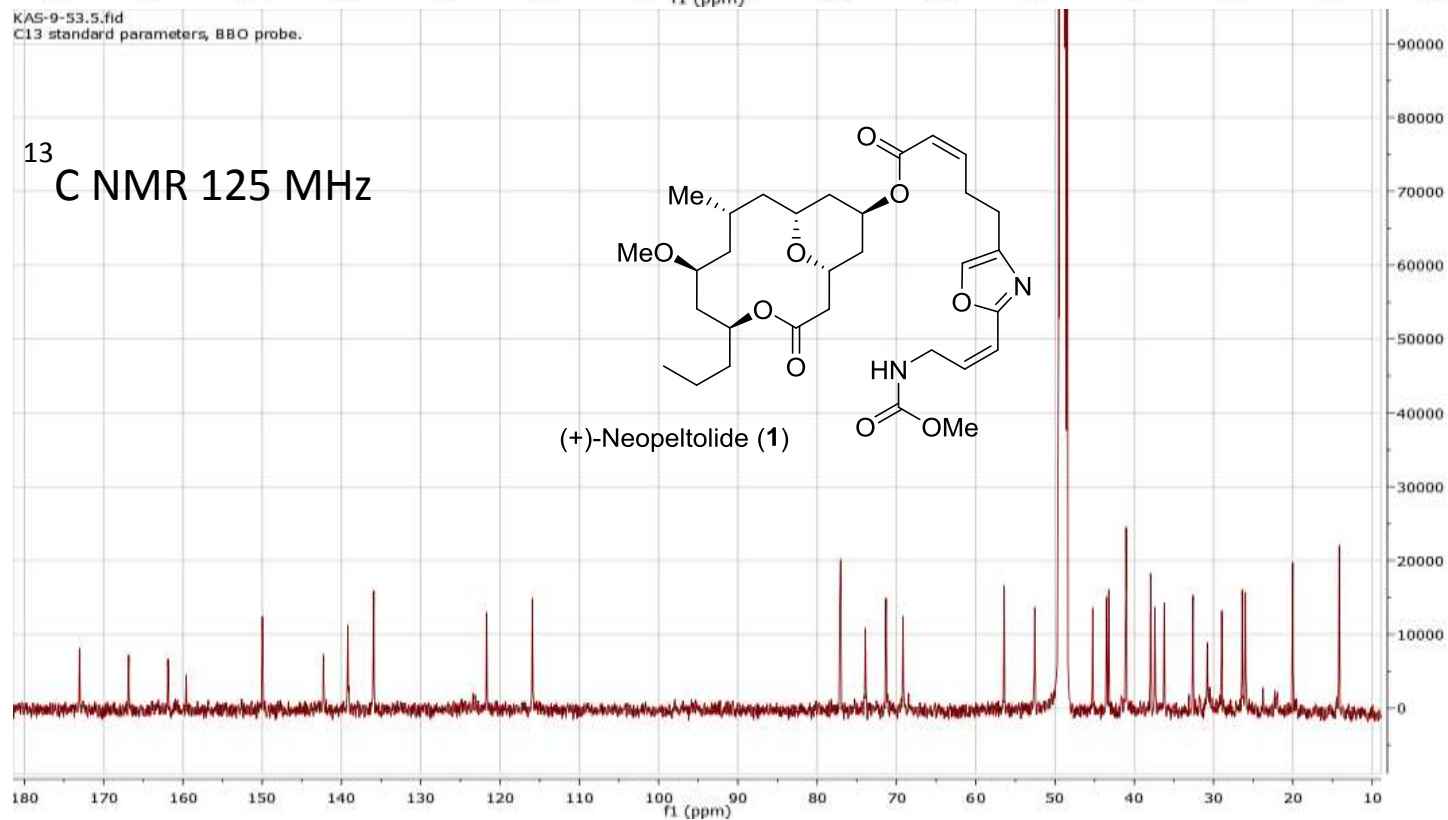

Supplement: c3ob41541d.pdf [file c3ob41541d.pdf]
